# Supplementary material for: Research priority setting in UK podiatric surgery
Source: Springer Nature journal article supplement (doi:10.1186/s13047-023-00629-9), 2023-01-01
Supplement: MOESM1 [file 25445068]

## Additional file 1

### Faculty of Podiatric Surgery Research Survey

|                                                                                                                                                                                                                                                                                                                                                                                                                                  |  |
|----------------------------------------------------------------------------------------------------------------------------------------------------------------------------------------------------------------------------------------------------------------------------------------------------------------------------------------------------------------------------------------------------------------------------------|--|
| <b>Qu 1. Which deanery are you part of?</b>                                                                                                                                                                                                                                                                                                                                                                                      |  |
| <ul style="list-style-type: none"><li>- North</li><li>- Central</li><li>- South</li></ul>                                                                                                                                                                                                                                                                                                                                        |  |
| <b>Qu 2. What is your area of practice?</b>                                                                                                                                                                                                                                                                                                                                                                                      |  |
| <ul style="list-style-type: none"><li>- NHS only                      Go to Qu 3</li><li>- Private only                 Go to Qu 5</li><li>- NHS &amp; Private                Go to Qu 3</li></ul>                                                                                                                                                                                                                               |  |
| <b>Qu3. For NHS practices in what setting is your unit?</b>                                                                                                                                                                                                                                                                                                                                                                      |  |
| <ul style="list-style-type: none"><li>- Acute</li><li>- Community</li></ul>                                                                                                                                                                                                                                                                                                                                                      |  |
| <b>Qu4. Please indicate the size of your unit – in terms of staffing?</b>                                                                                                                                                                                                                                                                                                                                                        |  |
| <ul style="list-style-type: none"><li>- Consultants</li><li>- (Number)</li><br/><li>- Podiatric Surgeons</li><li>- (Numbers)</li><br/><li>- Registrars</li><li>- (Number)</li><br/><li>- Trainees</li><li>- (Number)</li><br/><li>- Staff Podiatrists</li><li>- (Number)</li><br/><li>- MSK – Podiatrist</li><li>- (Number)</li><br/><li>- Other</li><li>- (Number)</li><br/><li>- (Free text – please state job role)</li></ul> |  |
| <b>Qu5. If you are only work in private practice, would you still be willing to be involved in research?</b>                                                                                                                                                                                                                                                                                                                     |  |
| <ul style="list-style-type: none"><li>- Yes</li><li>- No</li></ul>                                                                                                                                                                                                                                                                                                                                                               |  |
| <b>Qu6. Do you have any specific time in your job plan/timetable for research and audit?</b>                                                                                                                                                                                                                                                                                                                                     |  |
| <ul style="list-style-type: none"><li>- Yes</li><li>- (number)</li><li>- No</li></ul>                                                                                                                                                                                                                                                                                                                                            |  |

|                                                                                                                                                                                                                                                                                                          |             |
|----------------------------------------------------------------------------------------------------------------------------------------------------------------------------------------------------------------------------------------------------------------------------------------------------------|-------------|
| Qu7. Are you currently involved in any research / audit?                                                                                                                                                                                                                                                 |             |
| - Yes                                                                                                                                                                                                                                                                                                    | Go to Qu 8  |
| - No                                                                                                                                                                                                                                                                                                     | Go to Qu 10 |
| Qu8. If yes, please give details                                                                                                                                                                                                                                                                         |             |
| <ul style="list-style-type: none"> <li>- Type audit, case study, service evaluation, research</li> <li>- Free Text</li> <br/> <li>- Area / subject</li> <li>- Free text</li> <br/> <li>- Sample size</li> <br/> <li>- Free text</li> <br/> <li>- Staff involvement</li> <br/> <li>- Free Text</li> </ul> |             |
| Qu9. Would you be interested in collaborating your research with other centres for a larger multi centre study?                                                                                                                                                                                          |             |
| - Yes                                                                                                                                                                                                                                                                                                    | Go to Qu 11 |
| - No                                                                                                                                                                                                                                                                                                     | Go to Qu 11 |
| Qu10. If no – are there any specific obstacles preventing you from undertaking research                                                                                                                                                                                                                  |             |
| <ul style="list-style-type: none"> <li>- Time</li> <li>- Lack of staff</li> <li>- Lack of resources - funding</li> <li>- Size of caseload – too small</li> <li>- Inexperience with research / audit</li> <li>- Lack of research support within Trust</li> <li>- Other – free text</li> </ul>             |             |
| Qu11. Is your Trust affiliated to an academic institution that could assist you with research?                                                                                                                                                                                                           |             |
| <ul style="list-style-type: none"> <li>- Yes</li> <li>- (free text – please state where)</li> <li>- No</li> </ul>                                                                                                                                                                                        |             |
| Qu 12. If you were to participate in research how would you like to be involved – please tick all that apply?                                                                                                                                                                                            |             |
| <ul style="list-style-type: none"> <li>- All areas</li> <li>- Literature review</li> <li>- Research planning &amp; design</li> <li>- Data Collection</li> <li>- Statistical analysis</li> <li>- Other – please specify free text</li> </ul>                                                              |             |
| Qu12. Which of the following areas of research interest you? Please tick all that apply                                                                                                                                                                                                                  |             |
| <ul style="list-style-type: none"> <li>- Improve Profile of profession</li> <li>- Improve GIRFT</li> <li>- Improve health economics</li> <li>- All</li> <li>- Other</li> </ul>                                                                                                                           |             |

|                                                                                                                 |
|-----------------------------------------------------------------------------------------------------------------|
| - (Free Text – please state what)                                                                               |
| Qu13. Are there any other areas of research that you would like to see as part of the research strategy?        |
| - Free Text                                                                                                     |
| Qu14. What would be your top 3 research areas/questions which you think podiatric surgery should try to answer? |
| - Free text                                                                                                     |
| Qu15. Any other comments                                                                                        |
| - Free text                                                                                                     |
